# Supplementary material for: A facile and highly efficient short-time homogenization hydrothermal approach for the smart production of high-quality α-Fe2O3 for rechargeable lithium batteries
Source: Royal Society of Chemistry journal article supplement (doi:10.1039/c7ta04797e), 2017-01-01
Supplement: c7ta04797e1.pdf [file c7ta04797e1.pdf]

## Supporting Information

### A facile and highly efficient short-time homogenization hydrothermal approach for the smart production of high-quality $\alpha$ -Fe<sub>2</sub>O<sub>3</sub> for rechargeable lithium batteries

P. Santhoshkumar, K. Prasanna, Yong Nam Jo, I. Nirmal Sivagami, Suk Hyun Kang, and Chang Woo Lee\*

*Department of Chemical Engineering, College of Engineering, Kyung Hee University, 1732 Deogyong-daero, Gihung, Yongin, Gyeonggi 17104, South Korea*

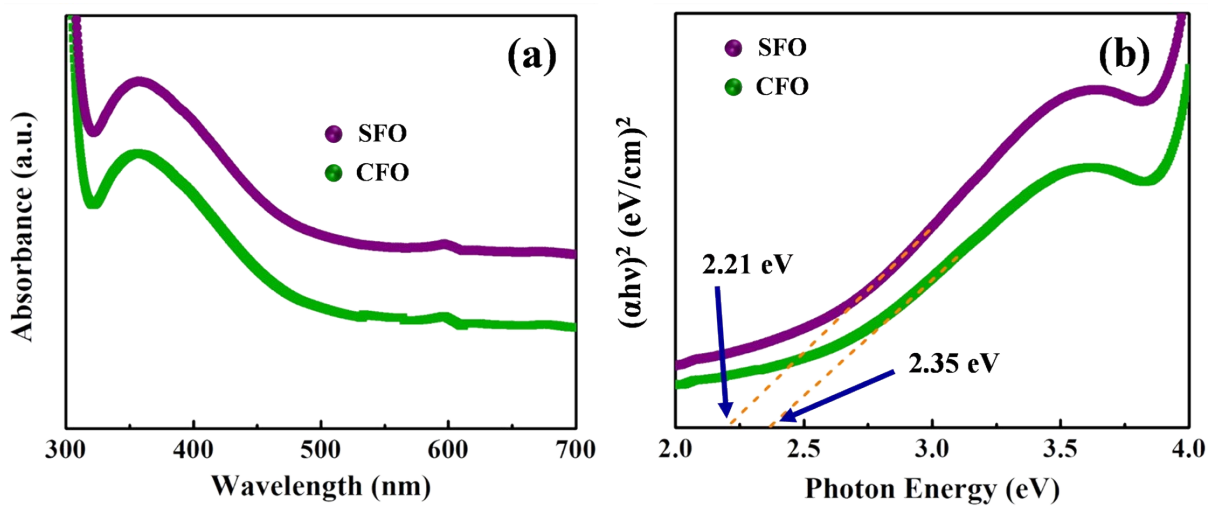

**Fig. S1.** (a & b) UV-visible absorbance spectra and Tauc's plot for mesoporous SFO and CFO.

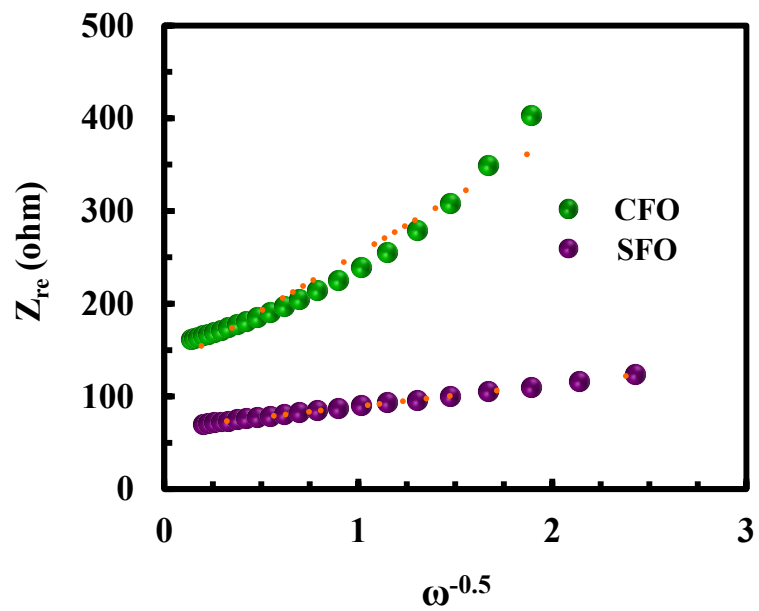

**Fig. S2.** Warburg impedance spectra of  $Z_{re}$  plotted against  $\omega^{-0.5}$  for the SFO and CFO samples after 100<sup>th</sup> cycle.
